# Supplementary material
Source: Springer Nature journal article supplement (https://www.springermedizin.de/resource/supplementary/12885_2013_4195_MOESM4_ESM.pdf/9465738)

**A**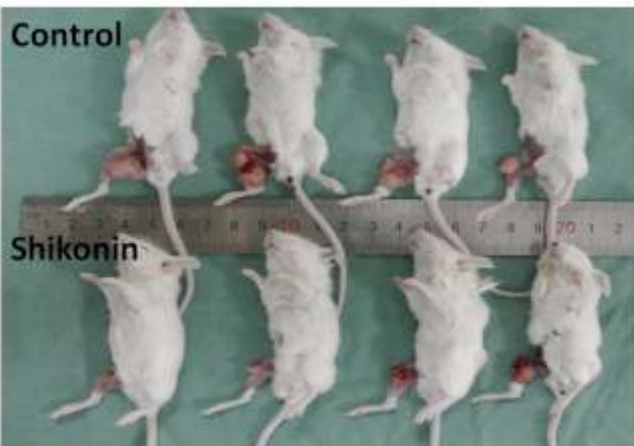**Control**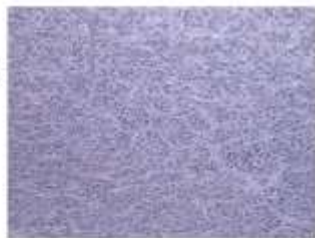**Shikonin**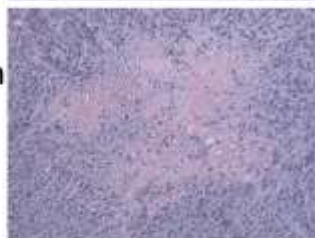**B**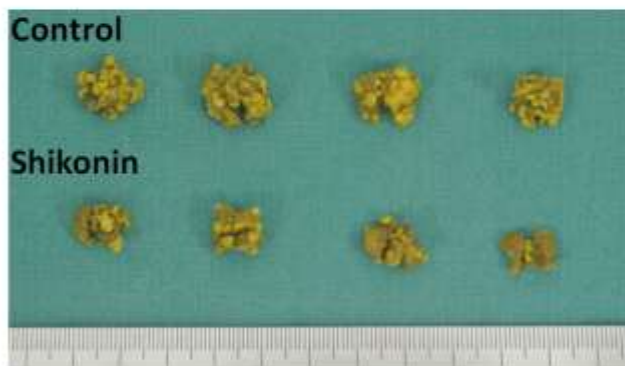**Control**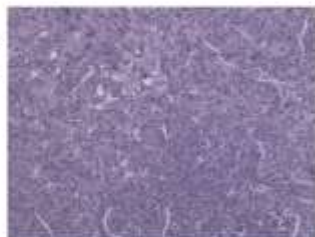**Shikonin**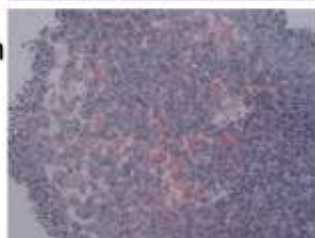**C**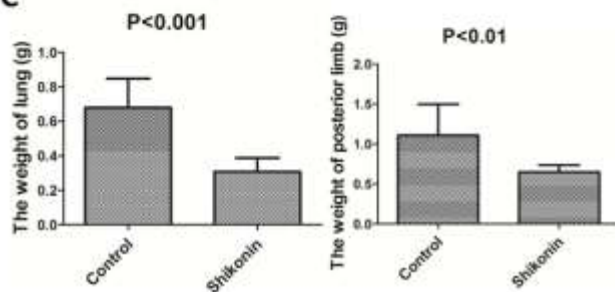**D****K7 tumor tissue**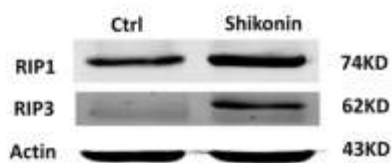

Supplement: MOESM4 [file 9465738]
